# Supplementary material for: A compact, high-purity source of HONO validated by Fourier Transform Infrared and Thermal Dissociation Cavity Ring-down Spectroscopy
Source: Copernicus journal article supplement (doi:10.5194/amt-2020-92), 2020-03-23
Supplement: Supplementary file 1 [file amt-2020-92-supplement.pdf]

*Supplement of*

**A compact, high-purity source of HONO validated by Fourier Transform  
Infrared and Thermal Dissociation Cavity Ring-down Spectroscopy**

Nicholas J. Gingerysty<sup>1</sup> and Hans D. Osthoff<sup>1</sup>

5 <sup>1</sup> Department of Chemistry, University of Calgary, 2500 University Drive N.W., Calgary, Alberta, Canada T2N 1N4

*Correspondence to:* Hans D. Osthoff (hosthoff@ucalgary.ca)

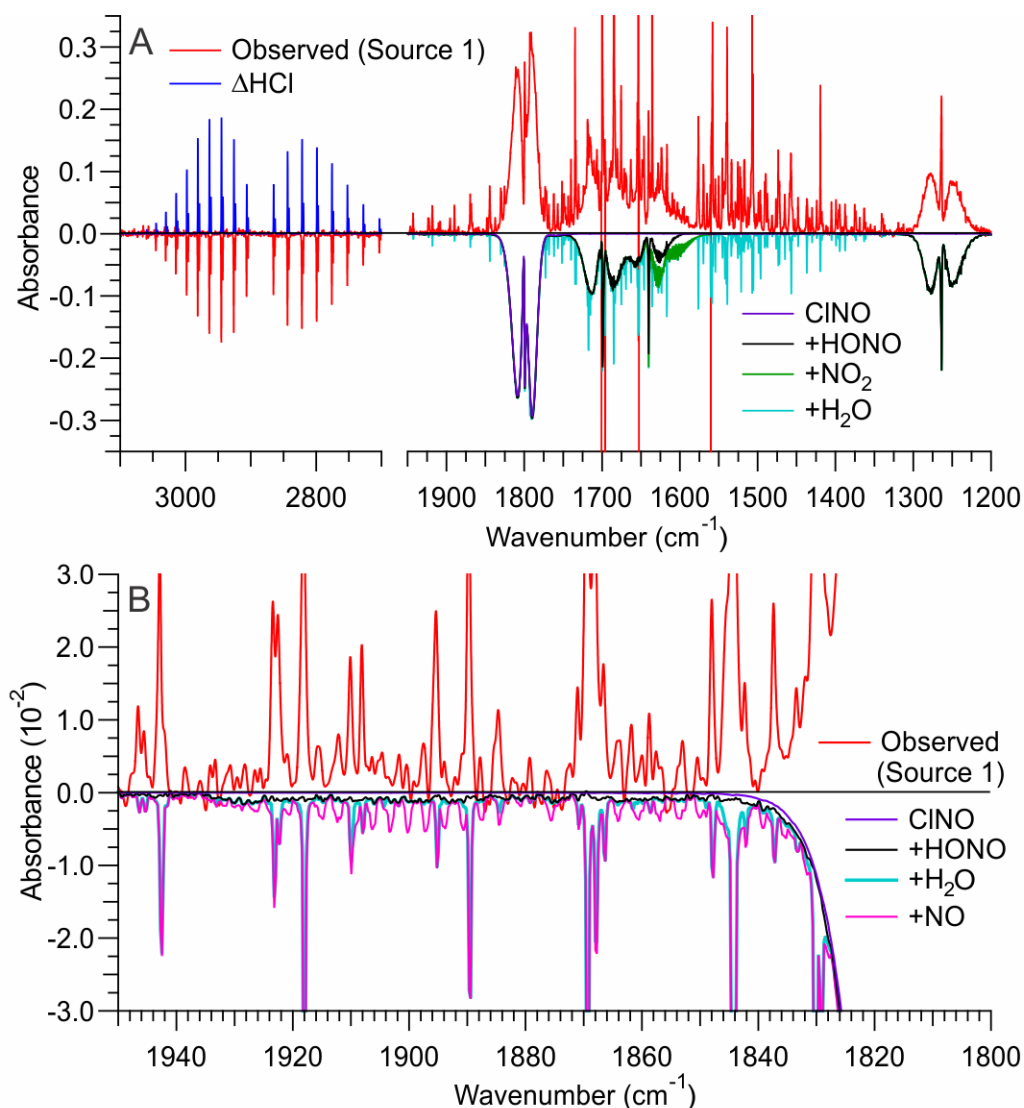

**Figure S1.** (A) Infrared spectrum (shown in red colour) of a gas stream generated by reaction of  $\text{HCl}_{(\text{g})}$  with  $\text{NaNO}_{2(\text{s})}$  using source 1. The reference spectrum was collected when  $\text{NaNO}_2$  was bypassed, i.e., contained  $\text{HCl}$ . The transmission spectrum (not shown) was void of  $\text{HCl}$  lines, indicating quantitative conversion of  $\text{HCl}$ . Literature spectra (Sharpe et al., 2004) were multiplied by the optical path length of 6.4 m and mixing ratios of the identified trace gases to reproduce the observed spectrum; the expected spectra were multiplied by -1 (i.e., inverted) prior to presentation. In this example, source 1 emitted  $\sim 38$  ppmv of  $\text{HONO}$ ,  $\sim 15.5$  ppmv of  $\text{CINO}$ ,  $\sim 4.0$  ppmv of  $\text{NO}_2$  and  $\sim 100$  ppmv of  $\text{H}_2\text{O}$  and consumed  $> \sim 38$  ppmv of  $\text{HCl}$ . (B) Expanded view of the 1950 to 1800  $\text{cm}^{-1}$  spectral region. The spectrum expected for  $\sim 4.0$  ppmv of  $\text{NO}$  is superimposed.

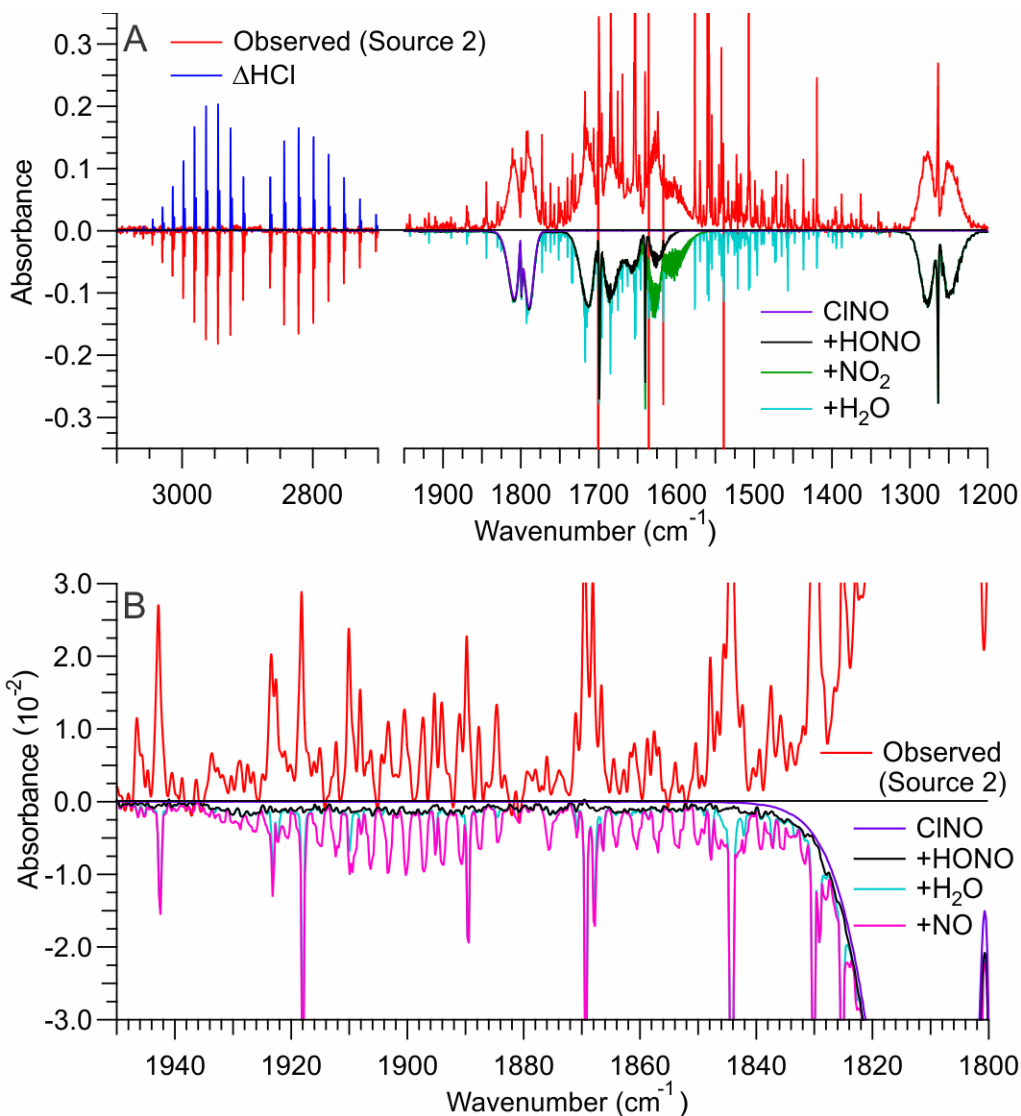

**Figure S2.** Infrared spectrum (shown in red colour) of a gas stream generated by reaction of  $\text{HCl}_{(\text{g})}$  with  $\text{NaNO}_{2(\text{s})}$  using source 2. In this example, source 2 emitted  $\sim 48$  ppmv of HONO,  $\sim 6.5$  ppmv of CINO,  $\sim 8.0$  ppmv of  $\text{NO}_2$  and  $\sim 80$  ppmv of  $\text{H}_2\text{O}$  and consumed  $>41.5$  ppmv of HCl. (B) An expanded view of the 1950 to 1800  $\text{cm}^{-1}$  spectral region. The spectrum expected for  $\sim 8.0$  ppmv of NO is superimposed.

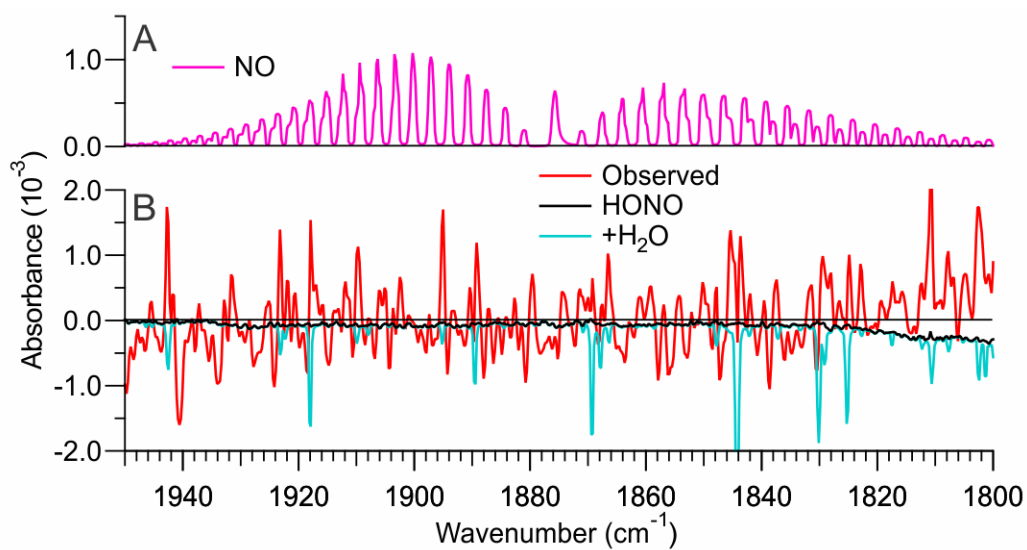

**Figure S3.** (A) Expected spectrum (Sharpe et al., 2004) for  $\sim 1.0$  ppmv of NO. (B) Infrared spectrum (shown in red colour) of the optimized source demonstrating the absence of NO.

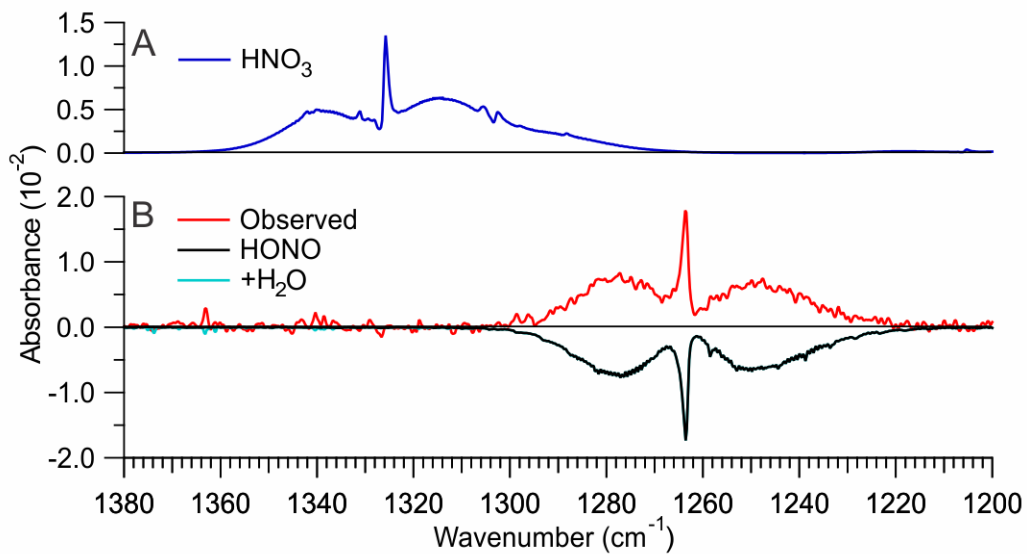

**Figure S4.** (A) Expected spectrum (Sharpe et al., 2004) for  $\sim 1.0$  ppmv of  $\text{HNO}_3$ . (B) Infrared spectrum (shown in red colour) of the optimized source demonstrating the absence of  $\text{HNO}_3$ .

## References

35

Sharpe, S. W., Johnson, T. J., Sams, R. L., Chu, P. M., Rhoderick, G. C., and Johnson, P. A.: Gas-phase databases for quantitative infrared spectroscopy, *Appl. Spectrosc.*, 58, 1452-1461, 2004.
